# Supplementary material for: Multi-scale measurement of stiffness in the developing ferret brain
Source: PubMed Central journal article supplement (PMC10667369; doi:10.1038/s41598-023-47900-4), 2023-11-23
Supplement: 41598_2023_47900_MOESM1_ESM.pdf [file 41598_2023_47900_MOESM1_ESM.pdf]

## Supplementary Figures

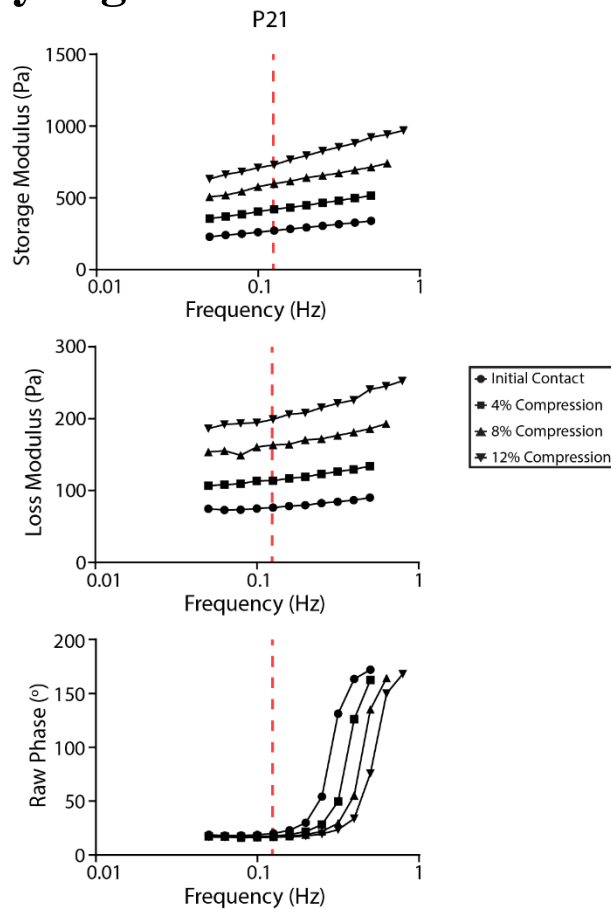

**Supplementary Figure S1. Representative frequency sweeps establishing common test frequency for Rheology.** The visual representation illustrates the selection of the frequency for rheometric strain sweeps. The red dashed line highlights the chosen frequency, which was selected to remain within the quasi-static region for measuring both the Storage Modulus and Loss Modulus. This choice was made in conjunction with a low Raw Phase value. Increases in the Raw Phase indicate a higher correction applied by the rheometer to the measured values, potentially complicating data analysis and interpretation.

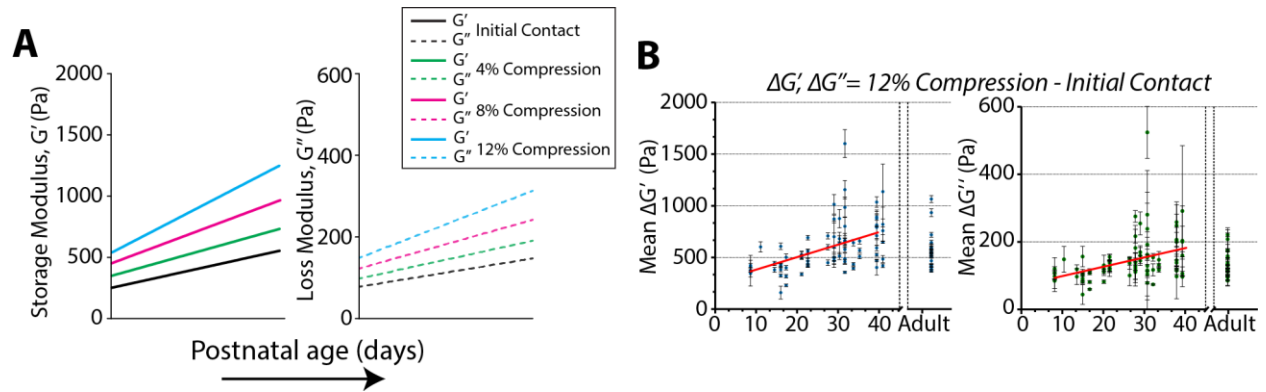

**Supplementary Figure S2. Elastic and viscous components of bulk brain stiffness show differential rates of increase with compression and age. (A)** Linear fit lines for  $G'$  and  $G''$  replotted from Figure 3. **(B)** Change in  $G'$  and  $G''$  due to compression of rheometer. Differences ( $\Delta G'$  and  $\Delta G''$ ) are between 12% compression and initial sample contact (greatest and least). Red lines represent linear fit.  $N \geq 3$ .

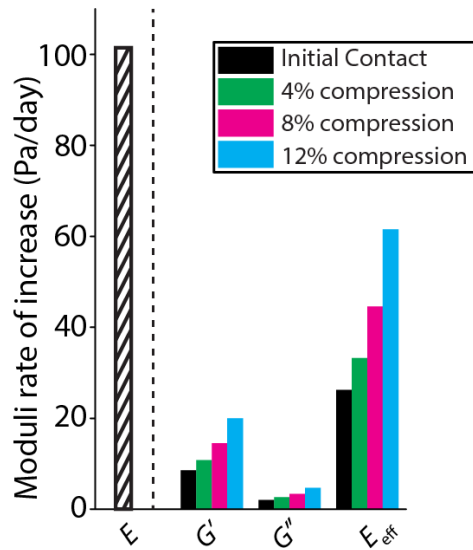

**Supplementary Figure S3. Rate of stiffness development in brain tissue differs on global and micro-scales.** Comparison of rates of increase in moduli (Pa/day) among AFM ( $E$ ), Storage modulus ( $G'$ ), Loss modulus ( $G''$ ), and effective Young's modulus ( $E_{eff}$ , calculated from rheometric data).
